# Supplementary material for: The Association Between Ultra-Processed Food Consumption and Adiposity Indexes in Adults Living in Tehran: A dose-response analysis within a cross-sectional study
Source: Research Square preprint supplement (doi:10.21203/rs.3.rs-5694977/v1), 2025-03-26
Supplement: Supplementary file 1 [file ab700f17ebac88a0c4a53272.docx]

**Supplementary materials.** Command used for dose-response analysis in STATA.

BAI:

drmeta md doses1 doses2, se(semd) data(n sdbmd) id(id) type(type)

One-stage fixed-effect dose-response model Number of studies = 1

Optimization = gls Number of obs = 14

AIC = 439.31 Model chi2(2) = 42.33

Log likelihood = -217.65716 Prob > chi2 = 0.0000

------------------------------------------------------------------------------

md | Coefficient Std. err. z P>|z| [95% conf. interval]

-------------+----------------------------------------------------------------

doses1 | .0491912 .0101896 4.83 0.000 .0292199 .0691625

doses2 | -.0420116 .0110934 -3.79 0.000 -.0637542 -.0202691

BMI

One-stage fixed-effect dose-response model Number of studies = 1

Optimization = gls Number of obs = 14

AIC = 934.04 Model chi2(2) = 211.90

Log likelihood = -465.01962 Prob > chi2 = 0.0000

------------------------------------------------------------------------------

md | Coefficient Std. err. z P>|z| [95% conf. interval]

-------------+----------------------------------------------------------------

doses1 | -.0151094 .0074816 -2.02 0.043 -.0297731 -.0004458

doses2 | .0410232 .0081413 5.04 0.000 .0250665 .0569799

------------------------------------------------------------------------------

.....................................................................................

BRI:

ne-stage fixed-effect dose-response model Number of studies = 1

Optimization = gls Number of obs = 14

AIC = 594.41 Model chi2(2) = 247.45

Log likelihood = -295.20556 Prob > chi2 = 0.0000

------------------------------------------------------------------------------

md | Coefficient Std. err. z P>|z| [95% conf. interval]

-------------+----------------------------------------------------------------

doses1 | .0131276 .0026152 5.02 0.000 .008002 .0182532

doses2 | -.0049457 .0028452 -1.74 0.082 -.0105221 .0006307

LAP:

One-stage fixed-effect dose-response model Number of studies = 1

Optimization = gls Number of obs = 14

AIC = 400.54 Model chi2(2) = 39.90

Log likelihood = -198.27038 Prob > chi2 = 0.0000

------------------------------------------------------------------------------

md | Coefficient Std. err. z P>|z| [95% conf. interval]

-------------+----------------------------------------------------------------

doses1 | .3518862 .057331 6.14 0.000 .2395195 .4642529

doses2 | -.3544125 .0624094 -5.68 0.000 -.4767327 -.2320924

............

TYG:

Optimization = gls Number of obs = 14

AIC = 1152.18 Model chi2(2) = 42.65

Log likelihood = -574.0902 Prob > chi2 = 0.0000

------------------------------------------------------------------------------

md | Coefficient Std. err. z P>|z| [95% conf. interval]

-------------+----------------------------------------------------------------

doses1 | .0044403 .0009295 4.78 0.000 .0026185 .0062621

doses2 | -.0056245 .0010055 -5.59 0.000 -.0075952 -.0036537

vai:

AIC = 632.61 Model chi2(2) = 121.39

Log likelihood = -314.30338 Prob > chi2 = 0.0000

------------------------------------------------------------------------------

md | Coefficient Std. err. z P>|z| [95% conf. interval]

-------------+----------------------------------------------------------------

doses1 | .0021641 .0063554 0.34 0.733 -.0102922 .0146204

doses2 | -.018544 .0069192 -2.68 0.007 -.0321055 -.0049825

wc

Optimization = gls Number of obs = 14

AIC = 690.87 Model chi2(2) = 168.22

Log likelihood = -343.43445 Prob > chi2 = 0.0000

------------------------------------------------------------------------------

md | Coefficient Std. err. z P>|z| [95% conf. interval]

-------------+----------------------------------------------------------------

doses1 | .1249631 .0194949 6.41 0.000 .0867538 .1631723

doses2 | -.0819688 .0212182 -3.86 0.000 -.1235558 -.0403819

whr:

Optimization = gls Number of obs = 14

AIC = -83.58 Model chi2(2) = 1.84

Log likelihood = 43.791815 Prob > chi2 = 0.3986

------------------------------------------------------------------------------

md | Coefficient Std. err. z P>|z| [95% conf. interval]

-------------+----------------------------------------------------------------

doses1 | .000267 .0013405 0.20 0.842 -.0023603 .0028943

doses2 | .0001349 .0014605 0.09 0.926 -.0027276 .0029975

whtr

One-stage fixed-effect dose-response model Number of studies = 1

Optimization = gls Number of obs = 14

AIC = 518.08 Model chi2(2) = 253.31

Log likelihood = -257.03933 Prob > chi2 = 0.0000

------------------------------------------------------------------------------

md | Coefficient Std. err. z P>|z| [95% conf. interval]

-------------+----------------------------------------------------------------

doses1 | .0009318 .000122 7.64 0.000 .0006927 .0011709

doses2 | -.0005938 .000133 -4.46 0.000 -.0008545 -.0003331

------------------------------------------------------------------------------

....
